# Supplementary material for: Cell-Penetrating Peptides-Based Liposomal Delivery System Enhanced Immunogenicity of Peptide-Based Vaccine against Group A Streptococcus
Source: MDPI journal article supplement (doi:10.3390/vaccines9050499), 2021-05-12

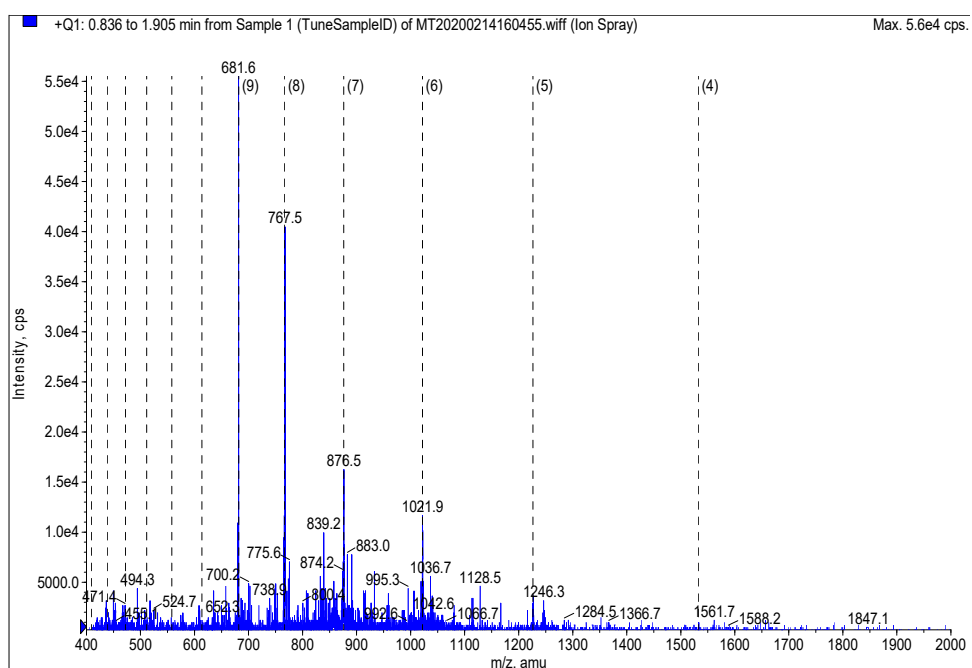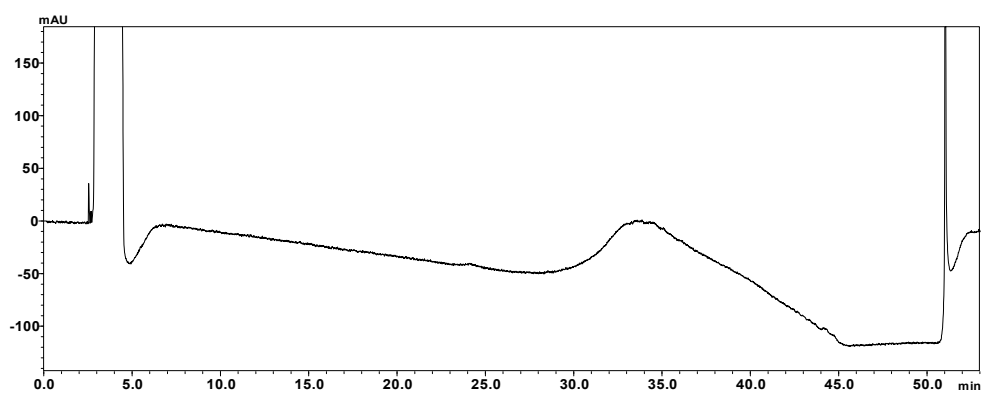

**Figure S1.** ESI-MS spectrum and analytical RP-HPLC spectrum of LCP-1.

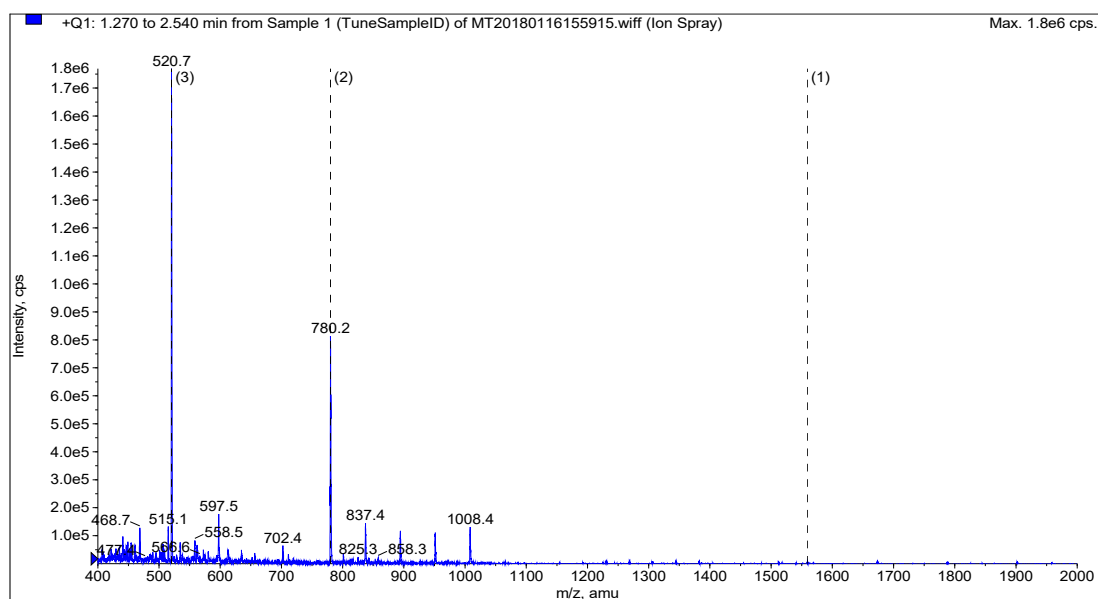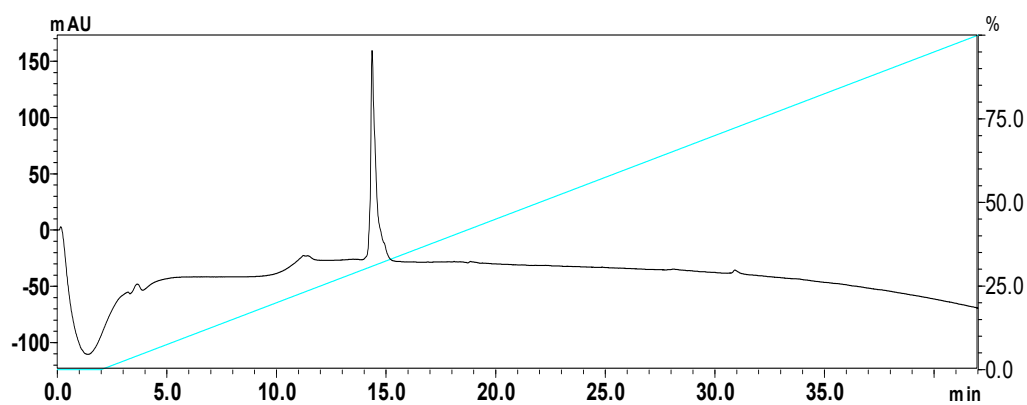

Figure S2. ESI-MS spectrum and analytical RP-HPLC spectrum of Tat<sub>47-57</sub>.

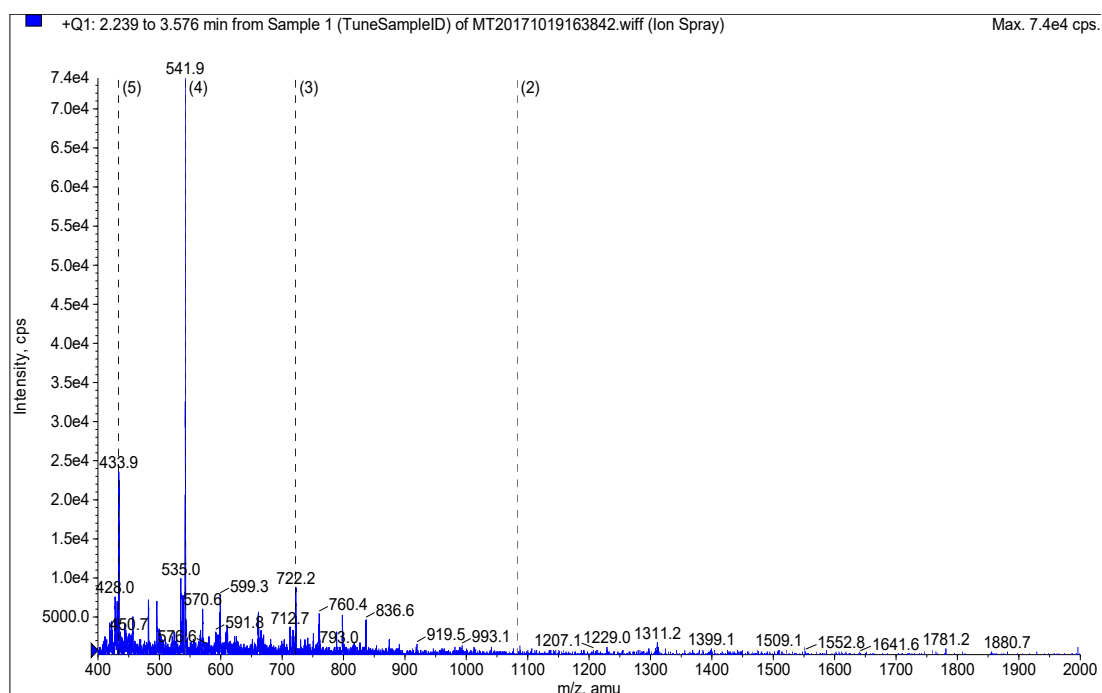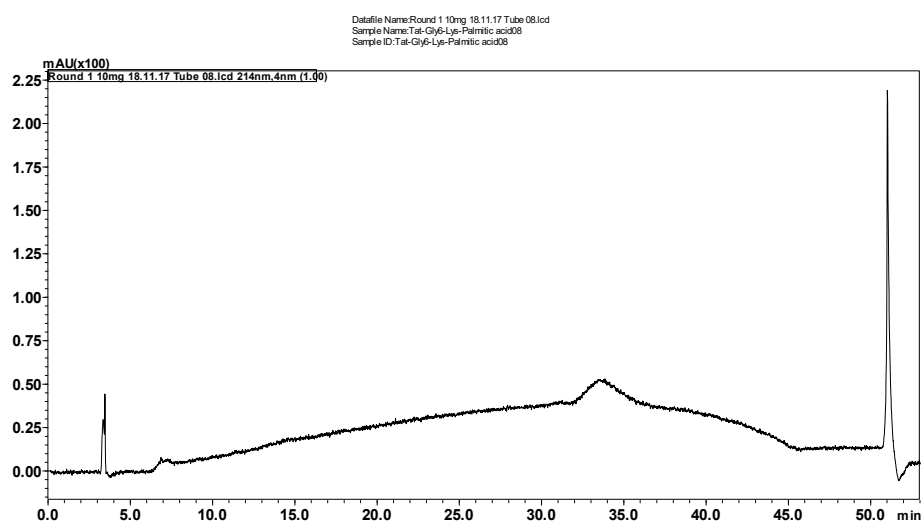

Figure S3. ESI-MS spectrum and analytical RP-HPLC spectrum of compound 1.

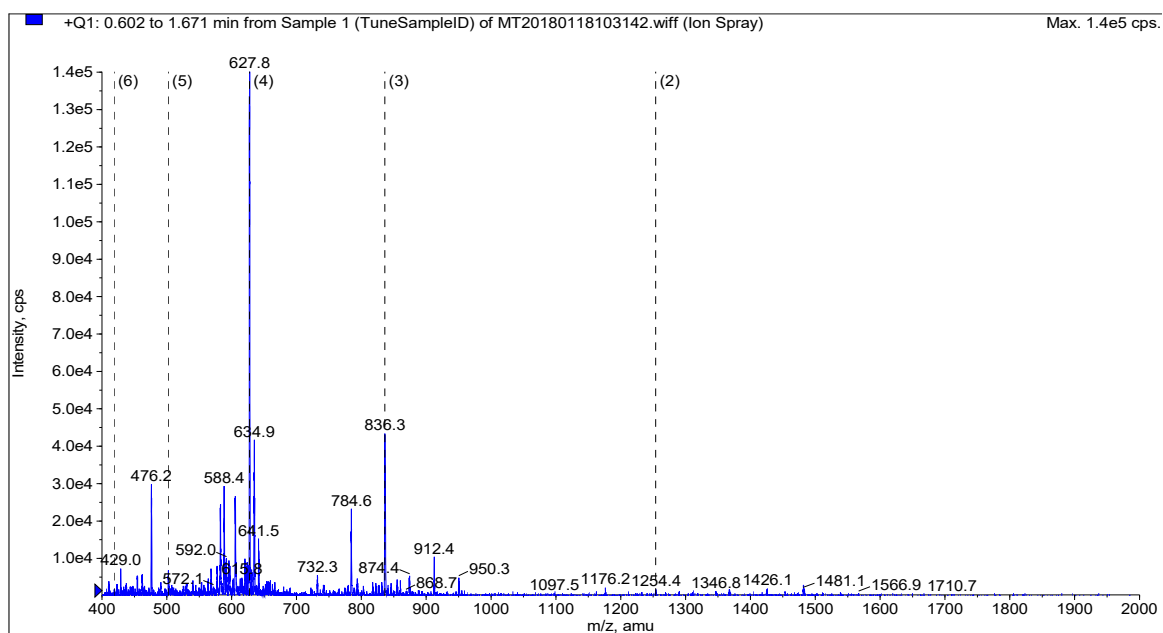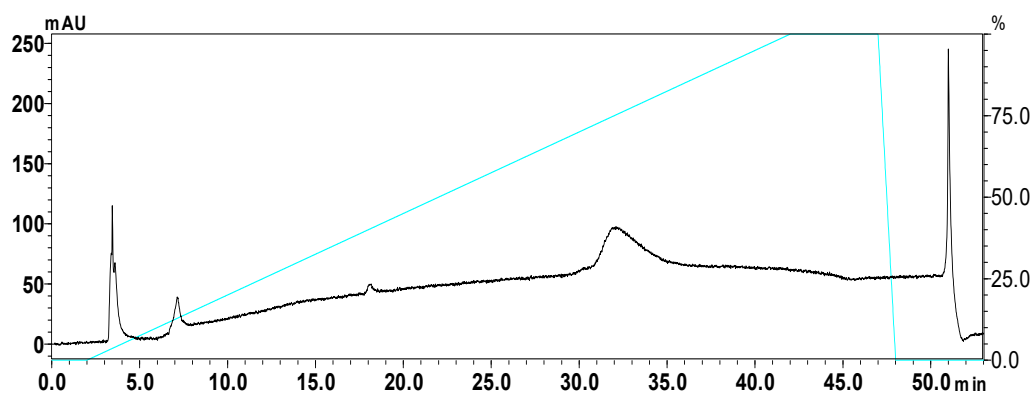

**Figure S4.** ESI-MS spectrum and analytical RP-HPLC spectrum of compound 2.



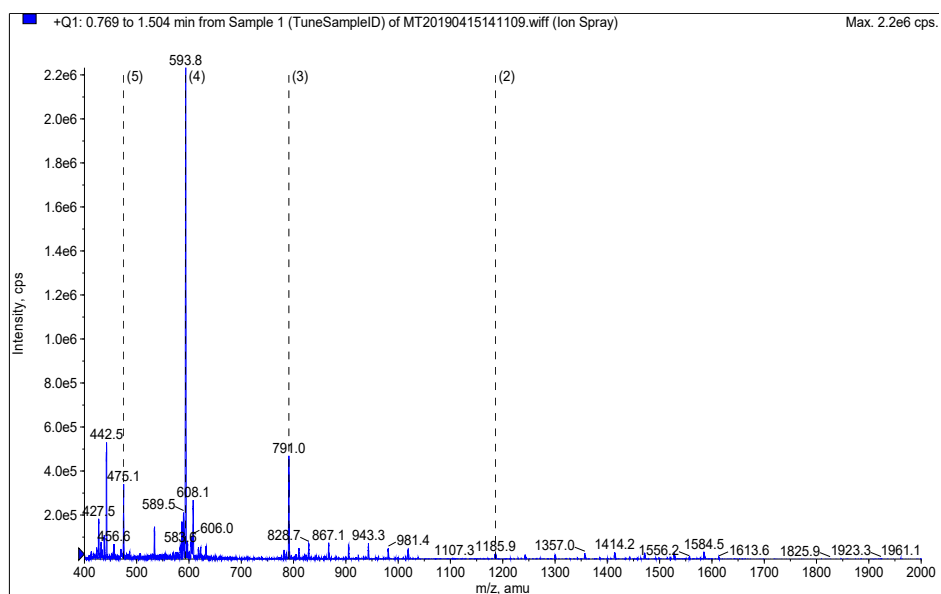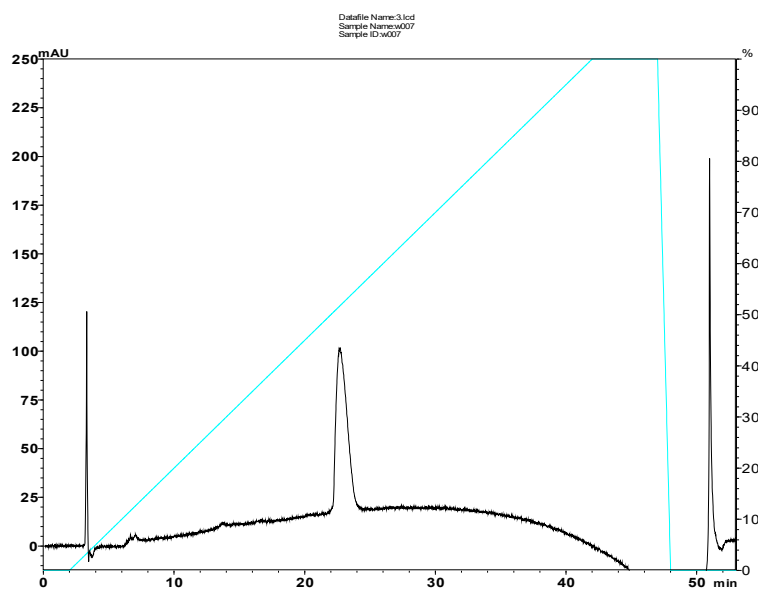

**Figure S6.** ESI-MS spectrum and analytical RP-HPLC spectrum of compound **4**.

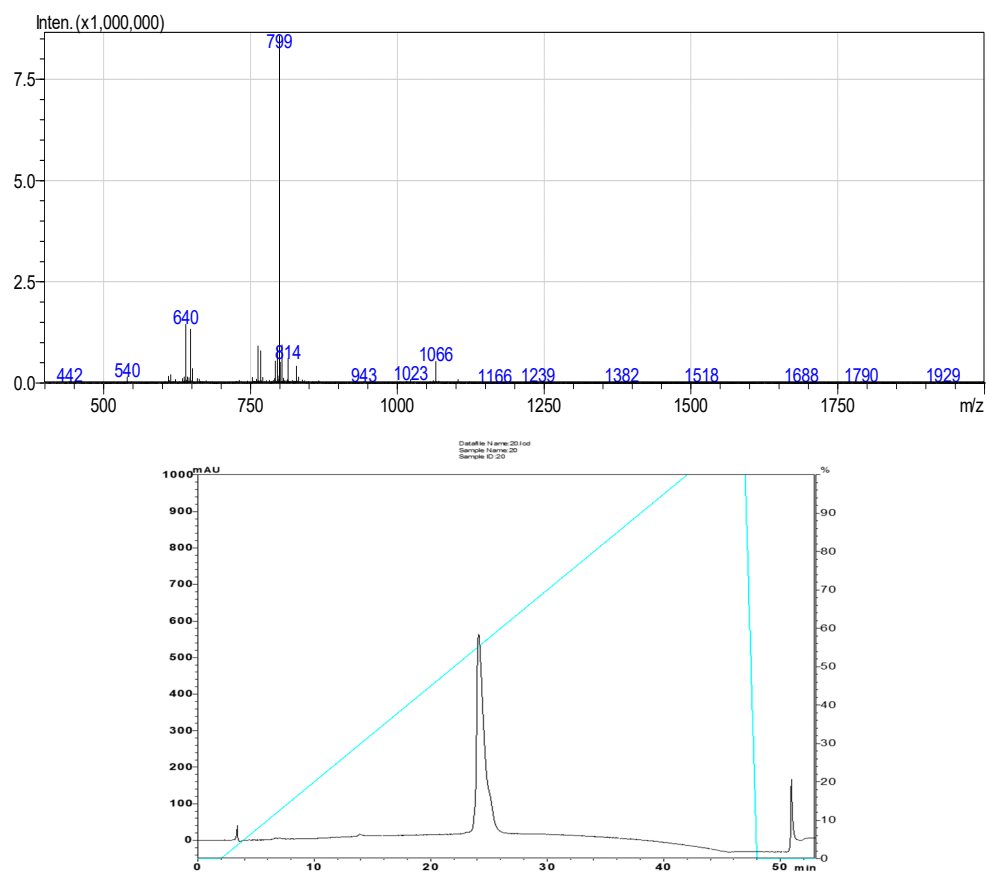

**Figure S7.** ESI-MS spectrum and analytical RP-HPLC spectrum of compound 5.

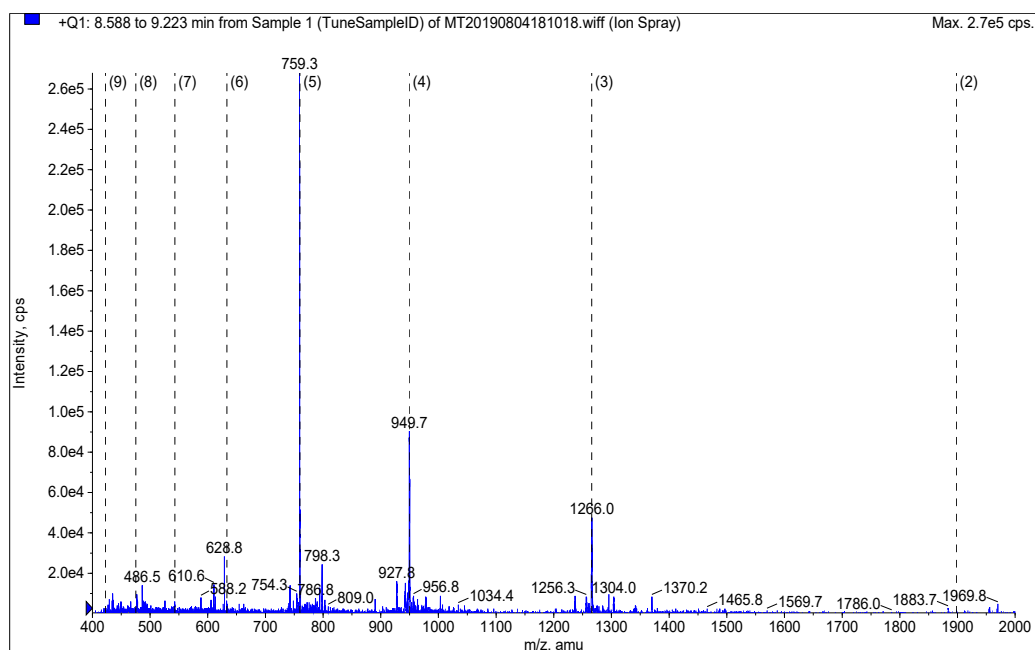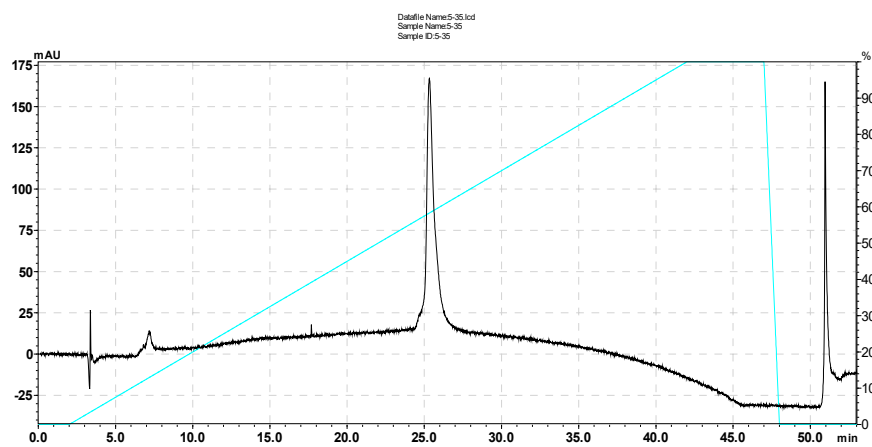

Figure S8. ESI-MS spectrum and analytical RP-HPLC spectrum of compound 6.

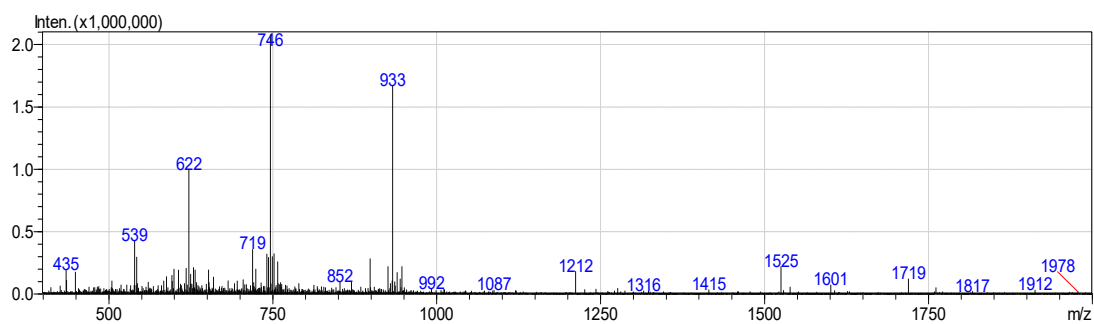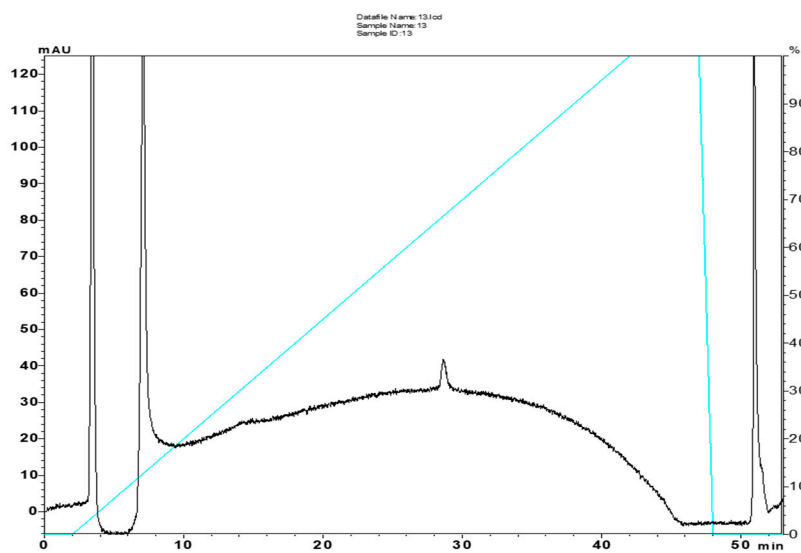

**Figure S9.** ESI-MS spectrum and analytical RP-HPLC spectrum of compound 7.

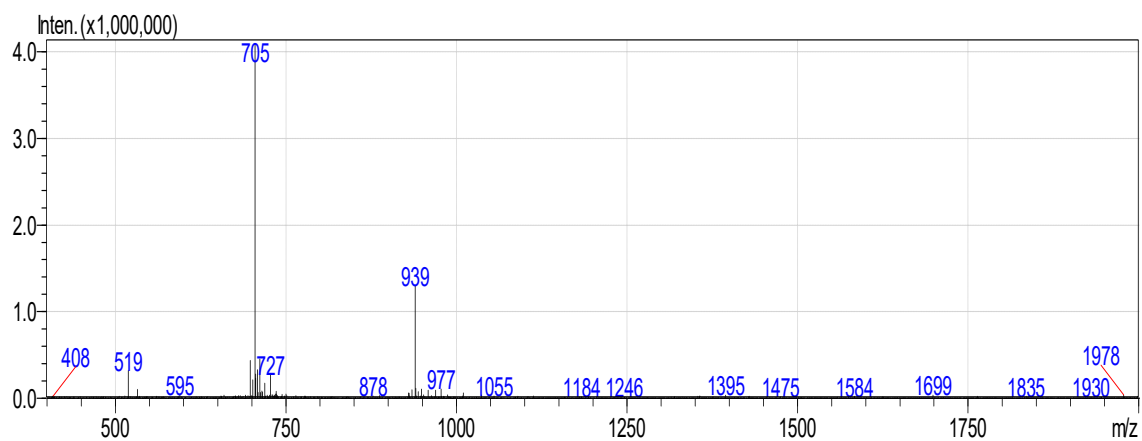

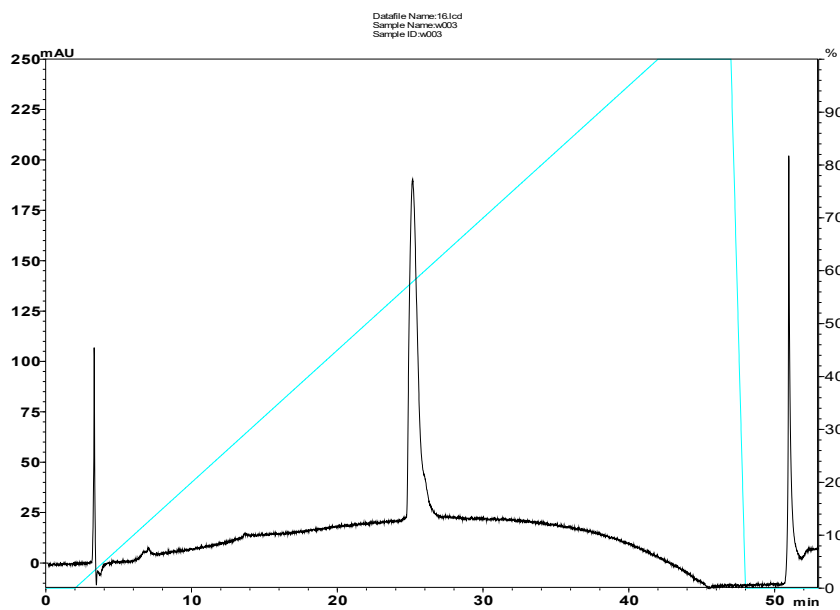

**Figure S10.** ESI-MS spectrum and analytical RP-HPLC spectrum of compound 8.

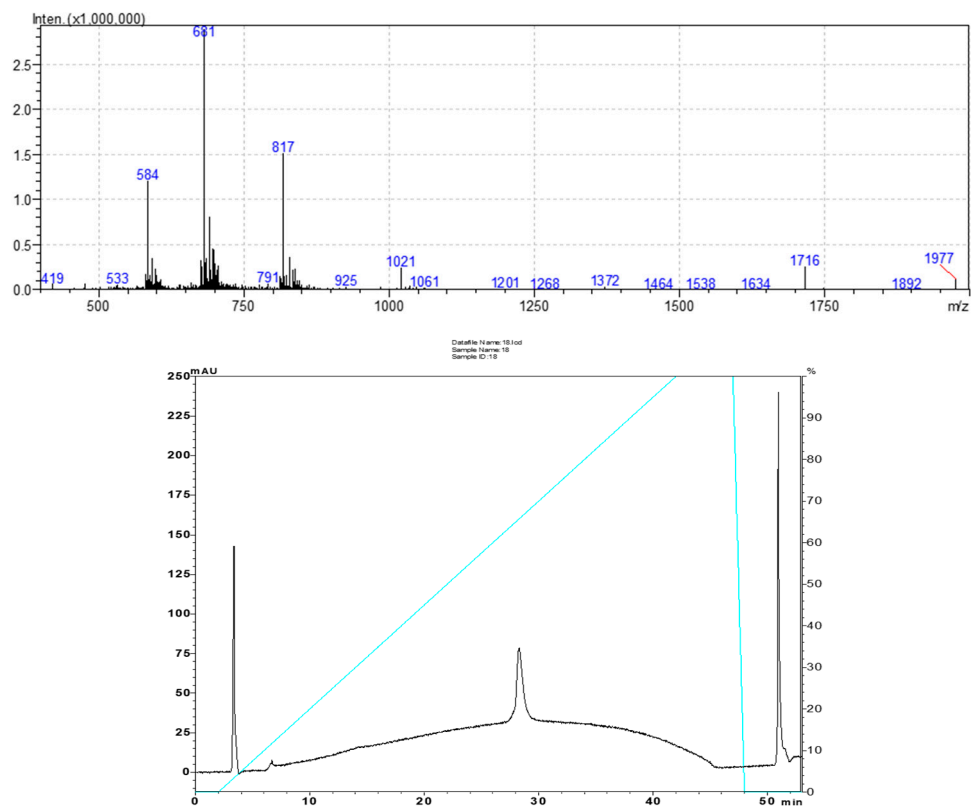

**Figure S11.** ESI-MS spectrum and analytical RP-HPLC spectrum of compound 9.

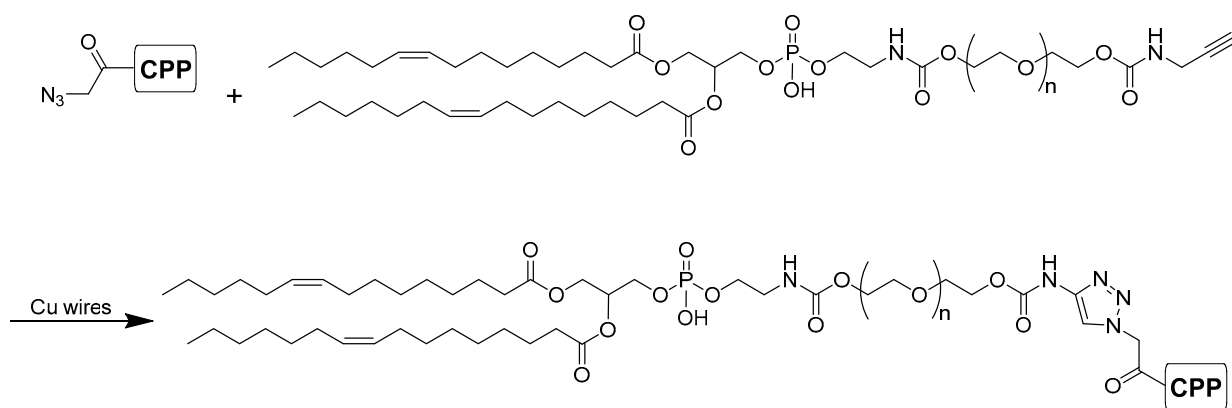

**10:**  $n \approx 77$ , CPP = Tat<sub>47-57</sub>

**Figure S12.** The click chemistry of compound **10**. Compound **10** was produced based on a copper-catalyzed alkyne-azide 1,3-dipolar cycloaddition (CuAAC) “click” reaction to conjugate DOPE-PEG<sub>3400</sub>-alkyne to the azide-Tat<sub>47-57</sub>.

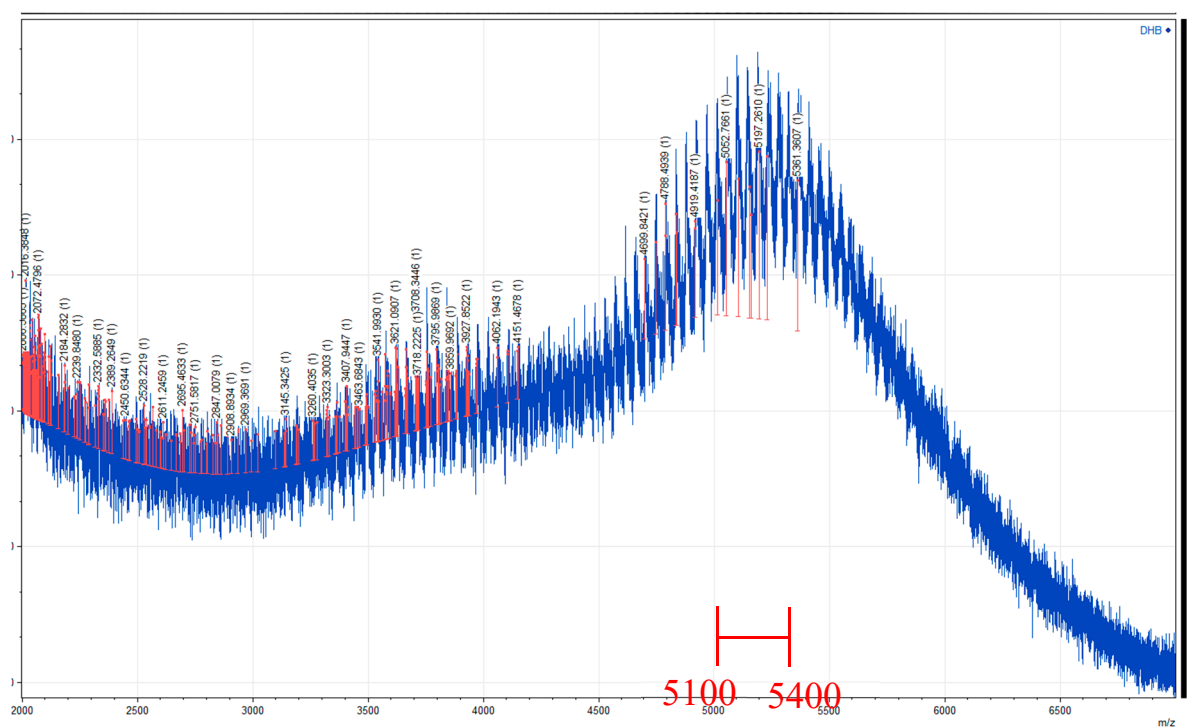

**Figure S13.** The MALDI-TOF Mass Spectrometry of DOPE-PEG<sub>3400</sub>-Tat<sub>47-57</sub> (molecular weight Range: 5558-5758) (compound 10)

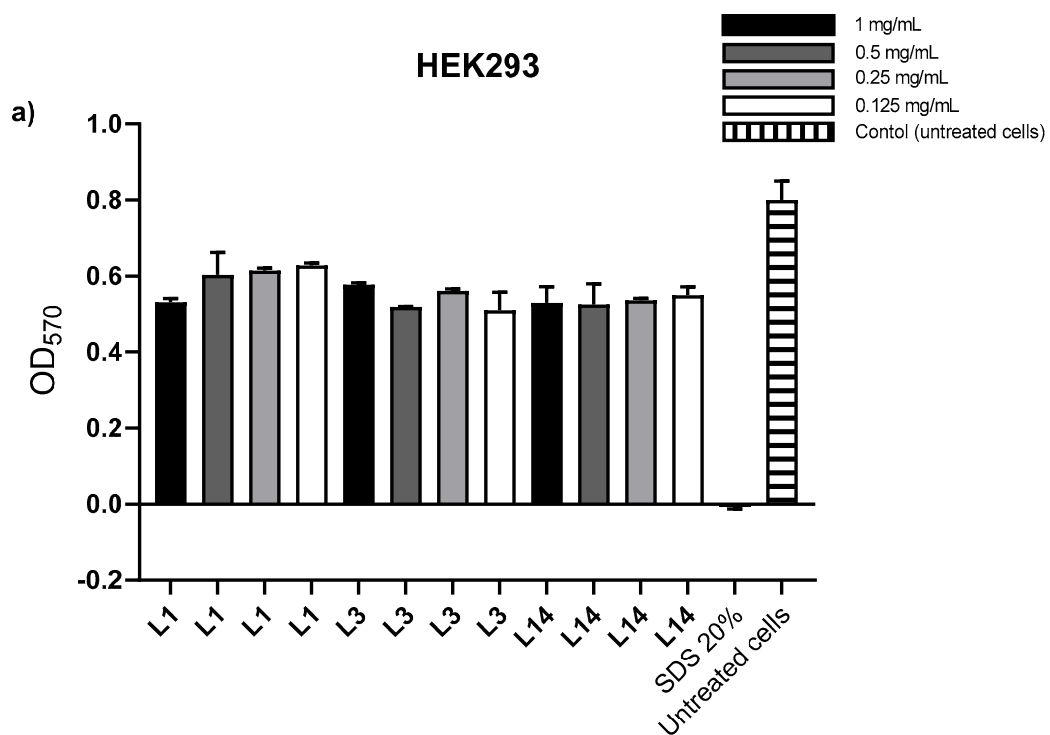

**Figure S14.** The cytotoxicity results for L1, L3 and L14 against HEK-293: human kidney cell line. Values are reported as mean: standard error of the mean (SEM).

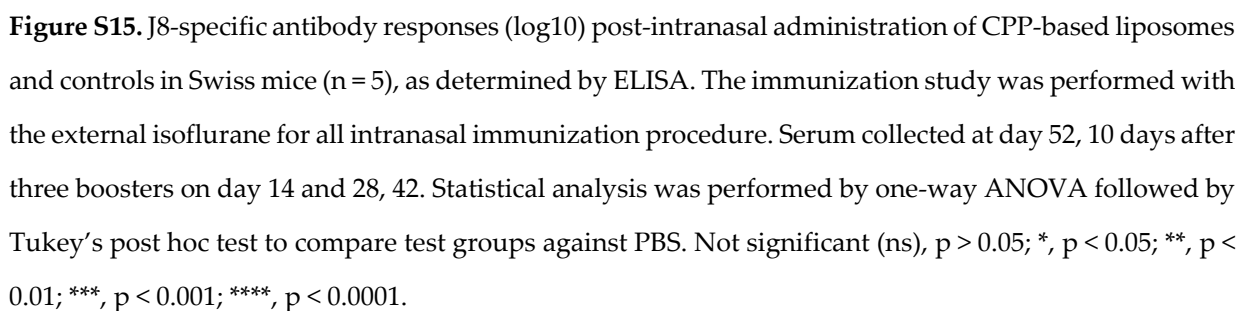

Supplement: s1 [file s1]
